# Supplementary material for: HDAC6 Inhibitors Rescued the Defective Axonal Mitochondrial Movement in Motor Neurons Derived from the Induced Pluripotent Stem Cells of Peripheral Neuropathy Patients with HSPB1 Mutation
Source: Hindawi journal article supplement (doi:10.1155/2016/9475981), 2016-01-01
Supplement: f1 [file 9475981.f1.pdf]

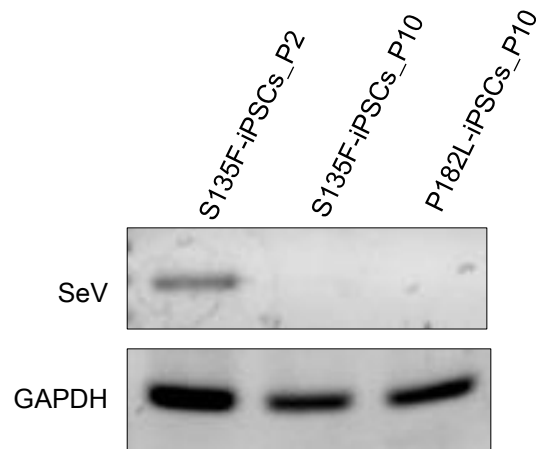

**Supplement Figure S1.** Assessment of Sendai viral genome contents in iPSCs.

Sendai viral genome sequence (SeV) was expressed in S135F-iPSCs at cellular passages of 2 (P2) but SeV was not detected in S135F-iPSCs and P182L-iPSCs at cellular passages of 10 (P10). Primer sequences were 5'-GGA TCA CTA GGT GAT ATC GAG C-3' (forward) and 5'-ACC AGA CAA GAG TTT AAG AGA TAT GTA TC-3' (reverse) for SeV.

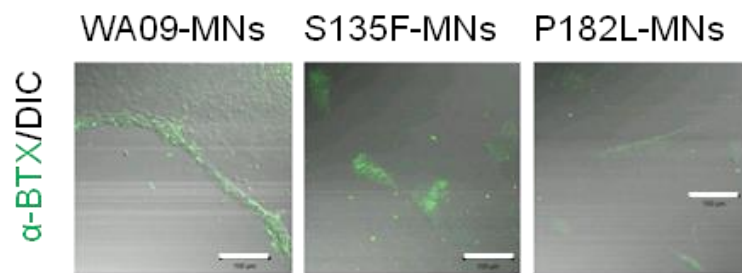

**Supplement Figure S2.** WA09-MNs, S135F-MNs and P182L-MNs formed neuromuscular junctions by co-culturing with myotube cells differentiated from C2C12 mice myoblast cells. Neuromuscular junctions were visualized by expression of acetylcholine receptors on myotube cells and staining with Alexa 488-conjugated  $\alpha$ -BTX (DIC, differential interference contrast image; original magnification, 400x).

**A**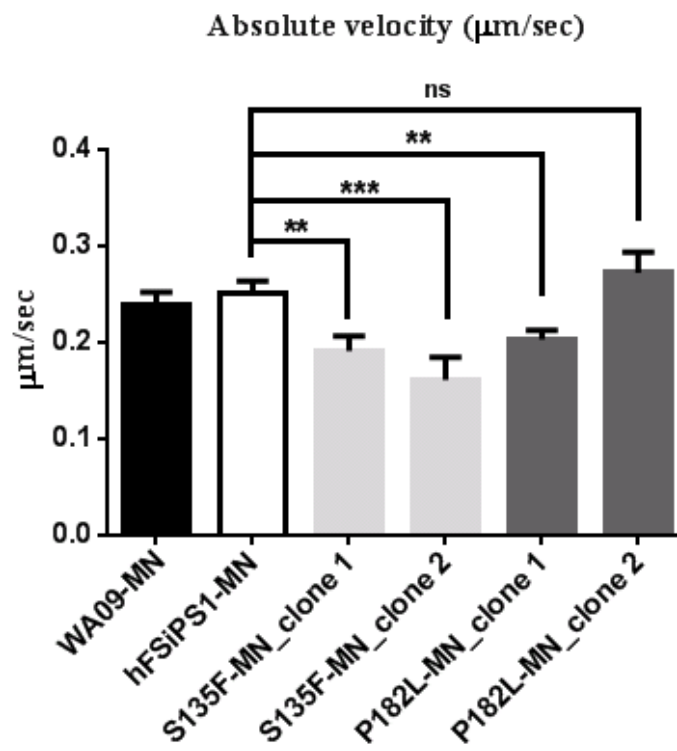**B**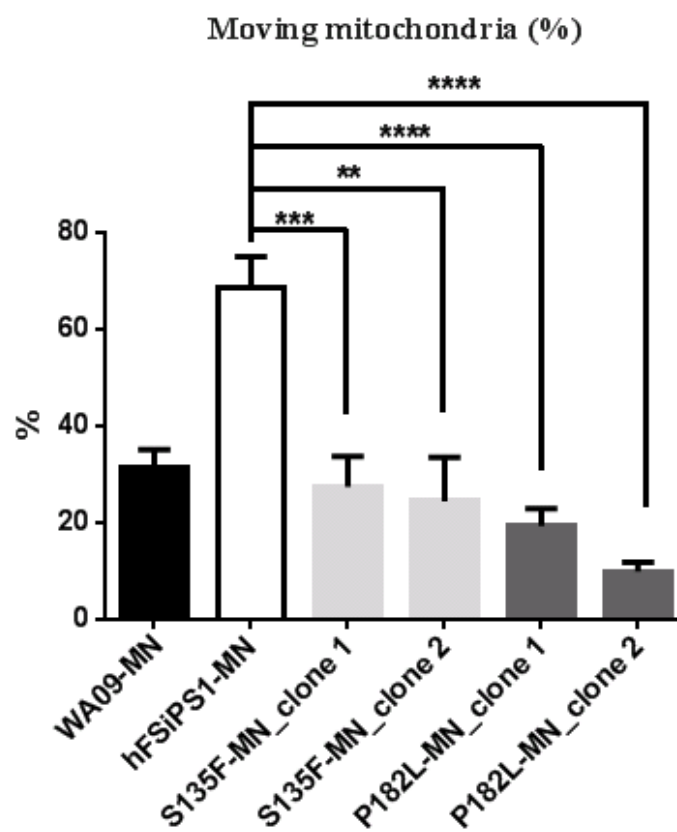

Supplement Figure S3 (Continued)

**Supplement Figure S3.** Axonal transport in S135F-MNs and P182L-MNs from two different iPSC clones. **(A)** Mitochondrial velocity in hFSiPS1-MNs (N=513), S135F-MNs\_clone 1 (N=383), S135F-MNs\_clone 2 (N=45), P182L-MNs\_clone 1 (N=344) and P182L-MNs\_clone 2 (N=152). **(B)** Moving mitochondria (%) in hFSiPS1-MNs (N=6), S135F-MNs\_clone 1 (N=13), S135F-MNs\_clone 2 (N=7), P182L-MNs\_clone 1 (N=21), and P182L-MNs\_clone 2 (N=21). Unpaired t-tests, \*P<0.05, \*\*P<0.01, \*\*\*P<0.001, and \*\*\*\*P<0.0001. ns, not significant.

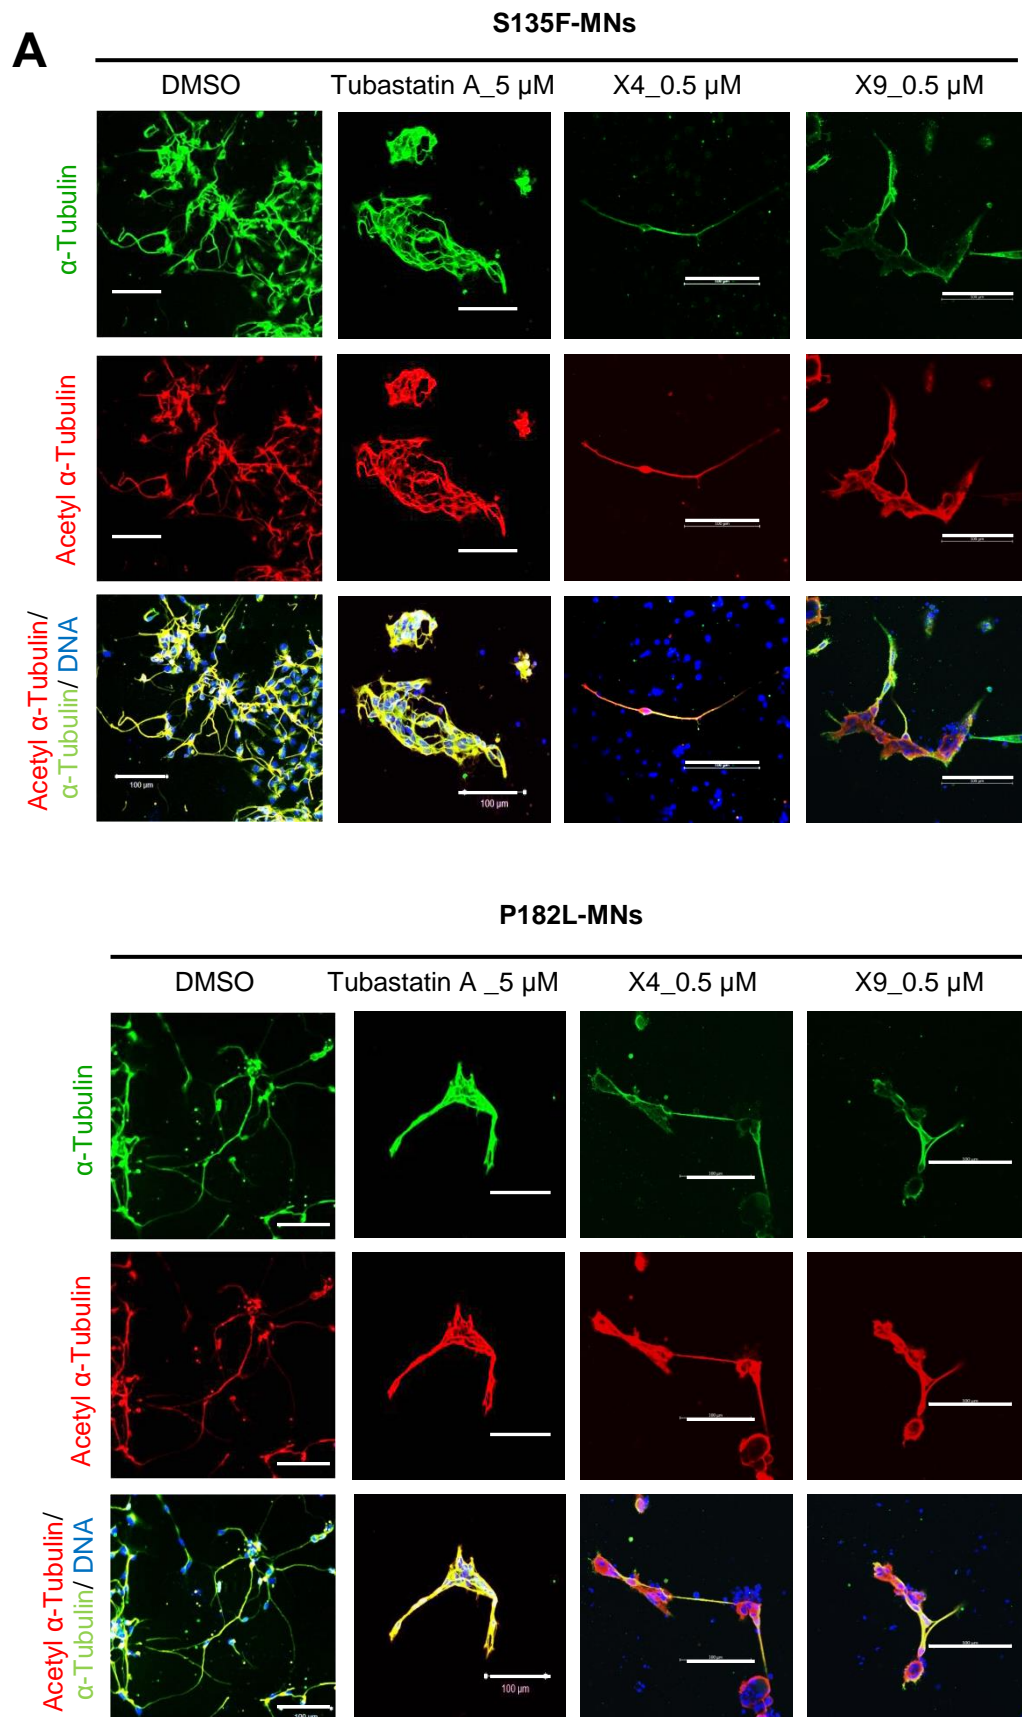

Supplement Figure S4 (Continued)

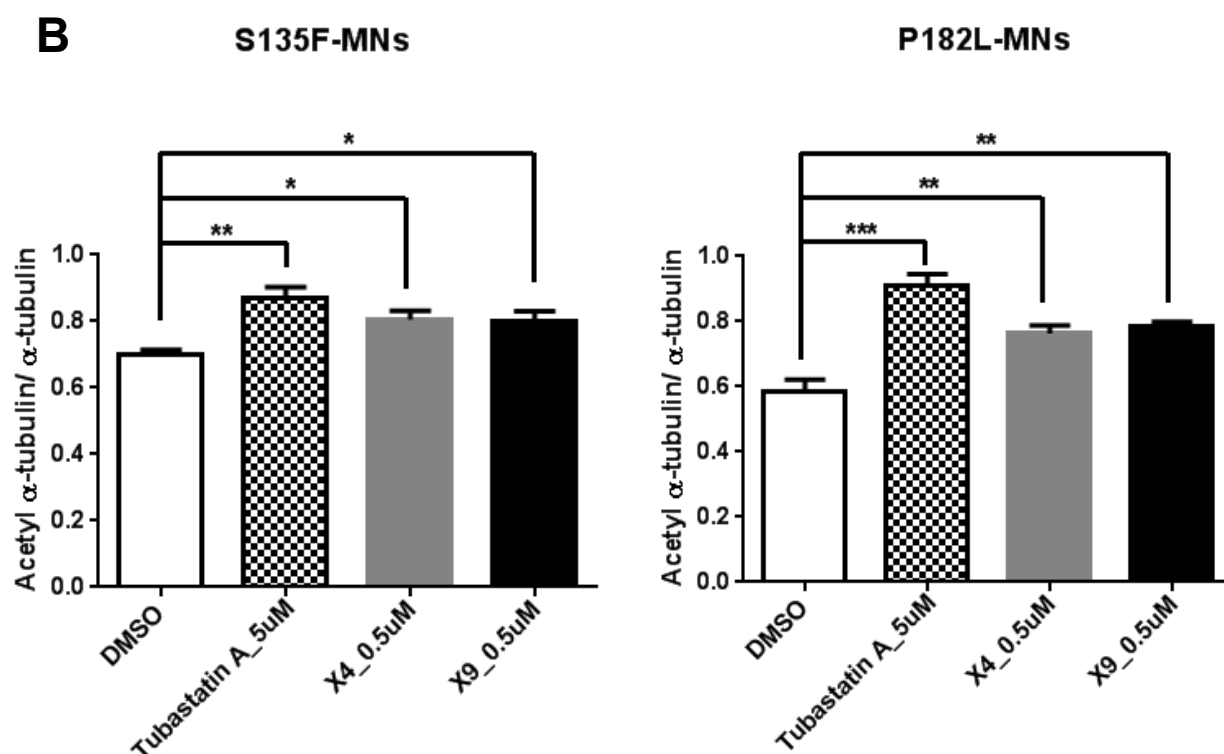

**Supplement Figure S4.** Immunostaining showed that treatment of HDAC6 inhibitors increased acetylated  $\alpha$ -tubulin levels in S135F-MNs and P182L-MNs. (A) Acetylation of  $\alpha$ -tubulin was visualized by immunostaining with anti-acetylated  $\alpha$ -tubulin Abs (red). Total  $\alpha$ -tubulin was also detected by staining with anti- $\alpha$ -tubulin Abs (green). (Original magnification, 400  $\times$ ). Scale bars: 100  $\mu$ m. (B) The extent of acetylated  $\alpha$ -tubulin was normalized with corresponding total  $\alpha$ -tubulin using ImageJ software. Number of fields for image analysis were: S135F-MNs + DMSO (N=4), S135F-MNs + Tubastatin A (N=5), S135F-MNs + X4 (N=3), S135F-MNs + X9 (N=10), P182L-MNs + DMSO (N=5), P182L-MNs + Tubastatin A (N=4), P182L + X4 (N=4) and P182L-MNs + X9 (N=4). Unpaired t-tests, \*P<0.05, \*\*P<0.01 and \*\*\*P<0.001.

**Supplement Table S1.** Absolute velocity ( $\mu\text{m}/\text{sec}$ ) of moving mitochondria

|             | DMSO            | Tubastain A     | X4                |                 | X9                |                 |
|-------------|-----------------|-----------------|-------------------|-----------------|-------------------|-----------------|
|             | 0.01 %          | 5 $\mu\text{M}$ | 0.5 $\mu\text{M}$ | 5 $\mu\text{M}$ | 0.5 $\mu\text{M}$ | 5 $\mu\text{M}$ |
| WA09-MNs    | $0.24 \pm 0.01$ | $0.26 \pm 0.01$ | $0.25 \pm 0.01$   | $0.33 \pm 0.01$ | $0.30 \pm 0.01$   | $0.30 \pm 0.02$ |
| hFSiPS1-MNs | $0.25 \pm 0.01$ | -               | -                 | -               | -                 | -               |
| S135F-MNs   | $0.19 \pm 0.01$ | $0.25 \pm 0.02$ | $0.48 \pm 0.06$   | $0.38 \pm 0.03$ | $0.25 \pm 0.02$   | $0.39 \pm 0.02$ |
| P182L-MNs   | $0.22 \pm 0.01$ | $0.27 \pm 0.02$ | $0.28 \pm 0.04$   | $0.33 \pm 0.02$ | $0.23 \pm 0.01$   | $0.29 \pm 0.01$ |

**Supplement Table S2.** Percentage of moving mitochondria (%)

|             | DMSO                | Tubastain A      | X4                |                     | X9                  |                  |
|-------------|---------------------|------------------|-------------------|---------------------|---------------------|------------------|
|             | 0.01 %              | 5 $\mu$ M        | 0.5 $\mu$ M       | 5 $\mu$ M           | 0.5 $\mu$ M         | 5 $\mu$ M        |
| WA09-MNs    | 31.39 $\pm$<br>3.74 | 49.71 $\pm$ 6.18 | 35.63 $\pm$ 6.28  | 49.74 $\pm$<br>4.72 | 38.31 $\pm$<br>6.02 | 34.07 $\pm$ 8.86 |
| hFSiPS1-MNs | 68.64 $\pm$<br>6.42 | -                | -                 | -                   | -                   | -                |
| S135F-MNs   | 26.37 $\pm$<br>5.01 | 21.73 $\pm$ 6.53 | 58.40 $\pm$ 10.42 | 48.31 $\pm$<br>5.25 | 55.33 $\pm$<br>5.86 | 62.88 $\pm$ 5.73 |
| P182L-MNs   | 14.19 $\pm$<br>2.14 | 30.91 $\pm$ 5.78 | 70.83 $\pm$ 4.17  | 37.59 $\pm$<br>3.86 | 45.07 $\pm$<br>4.48 | 33.14 $\pm$ 2.91 |



**Supplement Materials and Methods****Neuromuscular junction formation**

C2C12 mouse myoblast cells (CRL-1772, American Type Culture Collection (ATCC), Manassas, VA, USA) were cultured in DMEM supplemented with 10% FBS and 1 mM glutamine and penicillin/streptomycin. At a cell confluence of 70%, 1% insulin-transferrin-selenium supplement (Sigma) was added to the medium for myotube differentiation. After 2 days, 10  $\mu$ M cytosine arabinoside (Sigma) was added to DMEM containing 0.5% FBS to remove dividing cells. After 2-4 days, differentiated myotubes were trypsinized and plated at a low density of  $1 \times 10^4$  cells/well onto Matrigel-coated 8-well slide chambers (Nalgene/NUNC). After 1-2 days, CMT2F-MNs and ESC-MNs were co-cultured with myotubes at a ratio of 10:1 and supplemented with MN differentiation medium. After 1 week, functional neuromuscular junctions were visualized by staining MNs with Alexa 488-conjugated  $\alpha$ -bungarotoxin (Invitrogen).
